# Supplementary material for: De novo ChIP-seq analysis
Source: PubMed Central journal article supplement (PMC4579611; doi:10.1186/s13059-015-0756-4), 2015-09-23
Supplement: 13059_2015_756_MOESM1_ESM.pdf [file 13059_2015_756_MOESM1_ESM.pdf]

## Supplementary Information for De Novo ChIP-Seq analysis

Xin He†, A. Ercument Cicek†, Yuhao Wang†, Marcel Schulz, Hai-Son Le, Ziv Bar-Joseph\*

\*Corresponding author

† These authors have contributed equally

**Figure 1.** Motif discovery results obtained using the SeqPeak (Ji et al. 2008). For each motif (1) known motif (if any), (2) motif found by SeqPeak, (3) if that motif is matched to the database and (4) rank and corresponding p-value of the motif are shown.

| Target | Cell Type | Known Motif Logo | Motif | Tomtom matches motif?                         | Position in list, p-val |
|--------|-----------|------------------|-------|-----------------------------------------------|-------------------------|
| MAX    | A549      |                  |       | Yes                                           | 1st, 5.38052e-06        |
| HCFC1  | HepG2     | Unknown          |       | NA                                            | 1st                     |
| CEBPB  | MCF-7     |                  |       | Yes                                           | 1st, 2.30438e-08        |
| SREBF1 | GM12878   |                  |       | Yes, but using custom database for the target | 14th, 0.0004            |
| TCF7L2 | HeLa-S3   |                  | None  | NA                                            | NA                      |
| STAT1  | K562      |                  | None  | NA                                            | NA                      |
| TAL1   | K562      |                  |       | Yes                                           | 2nd, 1.89048e-05        |

**Supporting Table 1** Ratio of the chiptigs found by SEECER (k=17) that are overlapping with the peaks detected by peak-calling using the genome. Table is constricted by picking the top 2000 chiptigs from SEECER's results and then mapped to the genome. Columns show the percentage cutoff for the overlap between the chiptig and the peak. Result for each TF analyzed in mouse is shown.

|                | 40%          | 50%          | 60%          | 70%          | 80%          | 90%          |
|----------------|--------------|--------------|--------------|--------------|--------------|--------------|
| c-Myc          | 0.402        | 0.4015       | 0.4          | 0.3905       | 0.382        | 0.34         |
| CTCF           | 0.1525       | 0.141        | 0.1225       | 0.096        | 0.0575       | 0.031        |
| E2f1           | 0.878        | 0.87         | 0.86         | 0.8435       | 0.8085       | 0.715        |
| Esrrb          | 0.9405       | 0.9365       | 0.9155       | 0.886        | 0.8515       | 0.7575       |
| Klf4           | 0.6375       | 0.6355       | 0.6265       | 0.595        | 0.5395       | 0.4065       |
| Nanog          | 0.2465       | 0.2355       | 0.218        | 0.185        | 0.152        | 0.112        |
| n-Myc          | 0.149        | 0.139        | 0.121        | 0.1045       | 0.0955       | 0.0845       |
| p300           | 0.053        | 0.0525       | 0.051        | 0.0485       | 0.047        | 0.04         |
| Pou5f1         | 0.5265       | 0.5235       | 0.515        | 0.498        | 0.4595       | 0.3495       |
| Smad1          | 0.2235       | 0.2          | 0.1625       | 0.0945       | 0.0285       | 0.006        |
| Sox2           | 0.5495       | 0.547        | 0.541        | 0.523        | 0.4875       | 0.399        |
| STAT3          | 0.469        | 0.466        | 0.4615       | 0.453        | 0.4305       | 0.364        |
| Suz12          | 0.161        | 0.1605       | 0.16         | 0.159        | 0.1535       | 0.14         |
| Tcfcp211       | 0.974        | 0.9735       | 0.964        | 0.9495       | 0.932        | 0.888        |
| Zfx            | 0.736        | 0.7315       | 0.722        | 0.706        | 0.657        | 0.5475       |
| <b>Average</b> | <b>0.473</b> | <b>0.467</b> | <b>0.456</b> | <b>0.435</b> | <b>0.405</b> | <b>0.345</b> |

**Supporting Table 2** Ratio of the chiptigs found by Velvet (k=17) that are overlapping with the peaks detected by peak-calling using the genome. Table is constricted by picking the top 2000 chiptigs from Velvet 's results and then mapped to the genome. Columns show the percentage cutoff for the overlap between the chiptig and the peak. Result for each TF analyzed in mouse is shown.

|                | 40%           | 50%                | 60%                | 70%                | 80%                | 90%           |
|----------------|---------------|--------------------|--------------------|--------------------|--------------------|---------------|
| c-Myc          | 0.5425        | 0.5415             | 0.541              | 0.5365             | 0.526              | 0.4825        |
| CTCF           | 0.9425        | 0.9425             | 0.937              | 0.913              | 0.842              | 0.694         |
| E2f1           | 0.959         | 0.959              | 0.9575             | 0.9545             | 0.9505             | 0.9395        |
| Esrrb          | 0.9775        | 0.977              | 0.974              | 0.9695             | 0.965              | 0.948         |
| Klf4           | 0.266         | 0.2655             | 0.2635             | 0.257              | 0.247              | 0.214         |
| Nanog          | 0.9755        | 0.9755             | 0.9735             | 0.962              | 0.9435             | 0.8445        |
| n-Myc          | 0.622         | 0.6215             | 0.6195             | 0.6145             | 0.5955             | 0.544         |
| p300           | 0.0365        | 0.0365             | 0.036              | 0.0335             | 0.0285             | 0.023         |
| Pou5f1         | 0.2475        | 0.247              | 0.2435             | 0.2405             | 0.2305             | 0.2065        |
| Smad1          | 0.003         | 0.003              | 0.003              | 0.003              | 0.003              | 0.003         |
| Sox2           | 0.3355        | 0.3345             | 0.331              | 0.324              | 0.3065             | 0.265         |
| STAT3          | 0.2535        | 0.2535             | 0.2525             | 0.251              | 0.244              | 0.2325        |
| Suz12          | 0.262         | 0.262              | 0.2595             | 0.257              | 0.25               | 0.2335        |
| Tcfcp211       | 0.9865        | 0.9865             | 0.985              | 0.9825             | 0.9785             | 0.964         |
| Zfx            | 0.857         | 0.8545             | 0.85               | 0.838              | 0.8135             | 0.7275        |
| <b>Average</b> | <b>0.5511</b> | <b>0.550666667</b> | <b>0.548433333</b> | <b>0.542433333</b> | <b>0.528266667</b> | <b>0.4881</b> |

**Supporting Table 3.** The ranking of the correct motif (top ranked one if there are more than one) varying the number of chiptigs used with Velvet. Results for cancer related TFs whose motif is known are used. Velvet returns only 415 chiptigs for STAT1 analysis, which uses  $k = 17$  as kmer length. Thus, not top 1000 or top 2000 results are provided. The rest of the analyses use  $k = 19$ .

|        | Top 1000 ChIPtigs | Top 2000 ChIPtigs | All ChIPtigs |
|--------|-------------------|-------------------|--------------|
| MAX    | 1st               | 1st               | 1st          |
| CEBPB  | 1st               | 1st               | 1st          |
| SREBF1 | Not Found         | 7th               | 7th          |
| TCF7L2 | 1st               | 2nd               | 5th          |
| TAL1   | 1st               | 1st               | 1st          |

## Supporting Text 1

### Installation Guide

The pipeline requires 5 third party software tools: CD-HIT, meme suite, SEECER, razers3 and velvet. These software are already have compiled version in the *third-party* folder, in the software package provided (See supplementary web-site). If user wants to manually compile these software, the following commands should be used.

#### 1. Compile SEECER

Requirements: SeqAn, GNU Scientific Library

```
cd SEECER-0.2/
cd jellyfish-1.1.4/
./configure
make
cd ..
cd SEECER/
./configure
make
```

#### 2. Compile Velvet

```
cd velvet
make
```

#### 3. Compile meme

```
tar xzf meme_4.9.0_4.tar.gz
cd meme_4.9.0/
./configure --prefix=${software_home_directory}/third-party/meme --with-
url="http://meme.nbcr.net/meme"
make
make test
make install
(Here ${software_home_directory} is the home directory of software package)
```

#### 4. Compile CD-HIT

```
cd cd-hit-v4.6.1/
make
```

#### 5. Compile RazerS3

```
cd seqan-trunk/  
mkdir build/Debug  
cd build/Debug  
cmake ../.. -DCMAKE_BUILD_TYPE=Debug  
make test_basic  
./core/tests/basic/test_basic
```

### ***How to use this platform***

To run this pipeline, after it has been installed using the user guide above (or using the already compiled version). User should first move to the script directory and run the program as:  
./pipeline.sh <case read file> <control read file> <output directory> <kmer length> <list of motif databases (separated with ":")> <"1" to use SEECER, "0" for velvet>. Before running the program, user should first change the config.sh file to change ROOTDIR into home directory of this software package.

### ***Parameters Used for the Algorithms***

*Macs*: Used the default parameters. We performed some tests enabling PeakSplitter in the pipeline. This was done using the following parameters: "--bdg --call-subpeaks".

*Velvet*: It was run via running two different programs, namely Velveth and Velvetg. Velveth was input with the k-length 19 for all transcription factors except STAT1, for which we inputted 17. Only other parameter supplied was "-short". Velvetg was input with the parameter "-cov\_cutoff 1.5".

*SEECER*: It was input the following arguments: "-s 1 -k 19 -p "--failureTh=3 --eDelta 0.05 --entropy=1.0 --maxCorrections 3 --no-reuse-reads"

*RAZERS*: It was input the following arguments: "-m 5 -tc 8 -i 90".

*CD-HIT*: used with the default parameters.

*DREME*: It was input the following parameters. "-eps -e 0.05 -v 5 -oc"

*TOMTOM*: Tomtom was called using the following parameters: "-eps -verbosity 1 -min-overlap 5 -dist pearson -evaluate -thresh 0.05 -oc"

*SeqPeak*: It was called using the following parameters: "-minlen 3 -b 6 -w 12 -dat 1"

### **References**

Ji H, Jiang H, Ma W, Johnson DS, Myers RM, Wong WH et al, *An integrated software system for analyzing ChIP-chip and ChIP-seq data*. Nature Biotechnology, 2008. **26**: 1293-1300.
